# Supplementary material
Source: PubMed Central journal article supplement (PMC4166537)

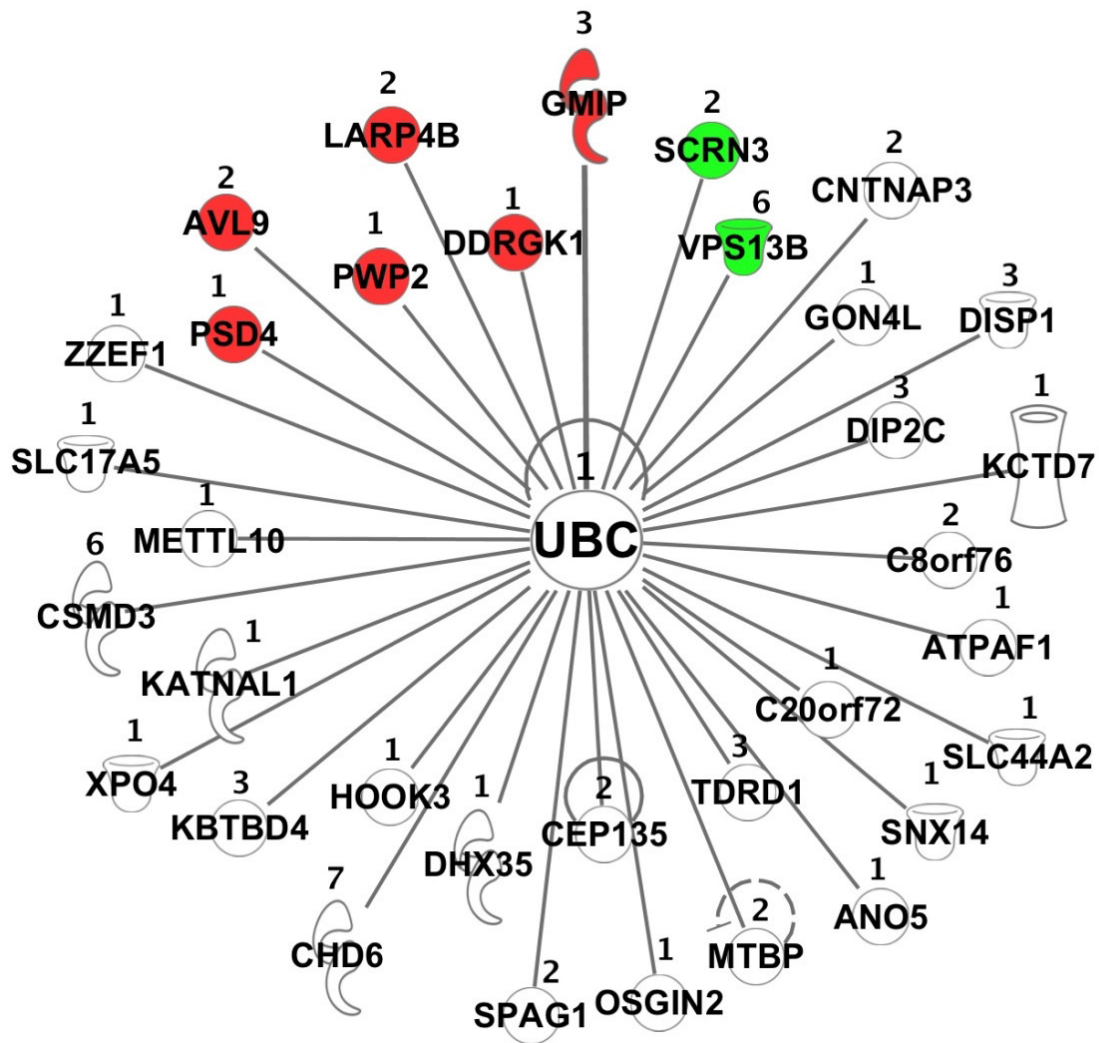

Gene X = ↓ Expression in Tumor

Gene X = ↑ Expression in Tumor

Supplement: NIHMS615541-supplement-1.pdf [file NIHMS615541-supplement-1.pdf]

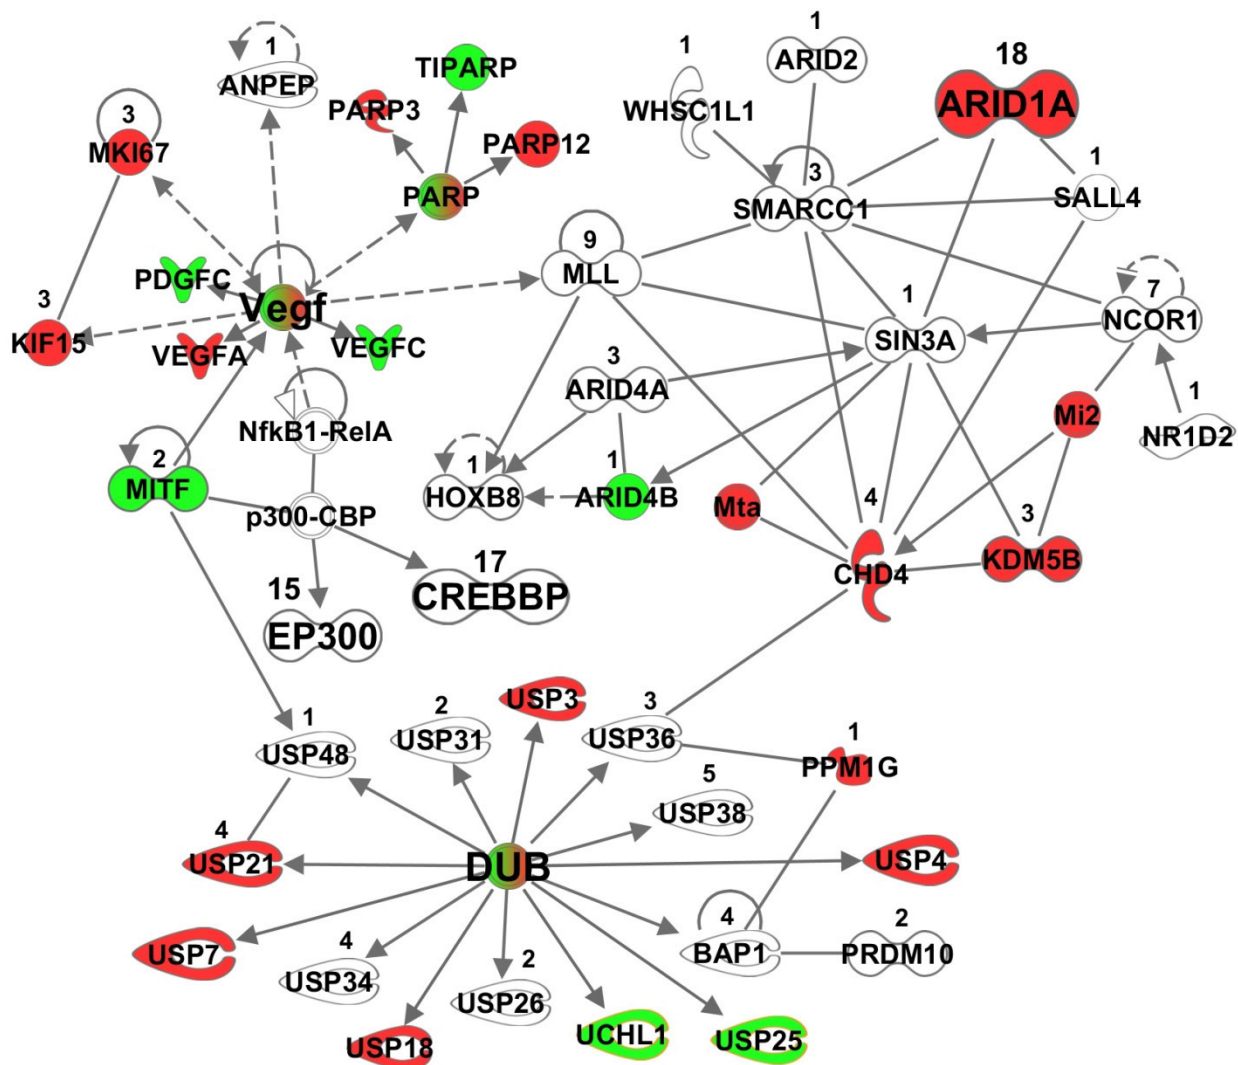

**Gene X** = ↓ Expression in Tumor

**Gene X** = ↑ Expression in Tumor

Supplement: NIHMS615541-supplement-2.pdf [file NIHMS615541-supplement-2.pdf]
